# Supplementary material
Source: PubMed Central journal article supplement (PMC3072021)

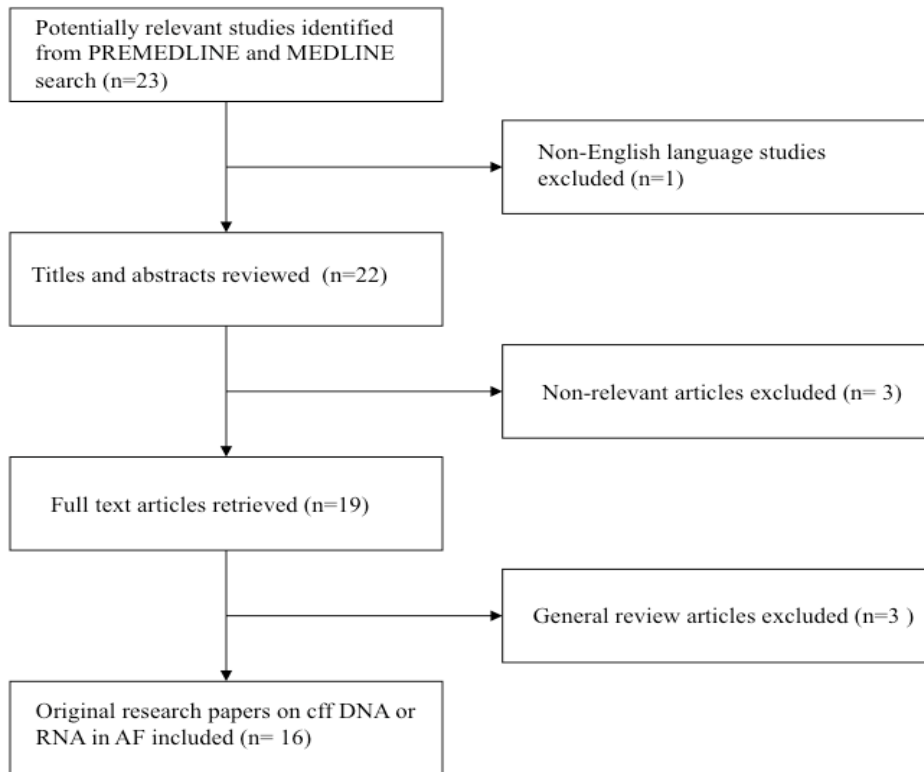

Figure 1. Flow diagram of the article selection process

Supplement: supp_dmq049_dmq049supp_fig.pdf [file supp_dmq049_dmq049supp_fig.pdf]
